# Supplementary material
Source: PubMed Central journal article supplement (PMC10394189)
Supplement: jmcp.2022.22215_s001.pdf [file jmcp.2022.22215_s001.pdf]

## **SUPPLEMENTARY MATERIALS**

### **Projecting the economic outcomes of switching patients with schizophrenia from oral atypical antipsychotics to once-monthly, once-every-3-months, and once-every-6-months paliperidone palmitate**

Laura Morrison, MScPH; Dee Lin, PharmD, MS; Carmela Benson, MSc; Isabelle Ghelerter, BA; Maude Vermette-Laforme, BA; Patrick Lefebvre, MA; Dominic Pilon, MA

**SUPPLEMENTARY TABLE 1** Population Inputs

**SUPPLEMENTARY TABLE 2** Model Inputs

**SUPPLEMENTARY TABLE 3** Cost Inputs

**SUPPLEMENTARY TABLE 4** Costs and Relapses Associated With Switching Nonadherent, Recently Relapsed Adults With Schizophrenia From an OAA to PP1M, With Subsequent Transitions to PP3M and PP6M

**SUPPLEMENTARY TABLE 5** Costs and Relapses Associated With Switching Nonadherent, Recently Relapsed Patients With Schizophrenia From an OAA to PP1M, With Subsequent Transitions to PP3M and PP6M, Based on Number of Relapses

**SUPPLEMENTARY TABLE 6** Costs and Relapses Associated With Switching Nonadherent, Young Adult Patients With Schizophrenia From an OAA to PP1M, With Subsequent Transitions to PP3M and PP6M

**SUPPLEMENTARY TABLE 7** Costs and Relapses Associated With Switching Nonadherent, Young Adult Patients With Schizophrenia From an OAA to PP1M, With Subsequent Transitions to PP3M and PP6M, Based on Number of Relapses

**SUPPLEMENTARY FIGURE 1** Distribution of Medicaid Patients With Schizophrenia (N=27,000) Based on Treatment With and Adherence to OAA, Presence of a Recent Relapse, and Age Category

**SUPPLEMENTARY FIGURE 2** Net Cost Savings Per Patient Switched From OAA to PP1M With Subsequent Transitions to PP3M, and PP6M, Among Nonadherent, Recently Relapsed Adults

**SUPPLEMENTARY FIGURE 3** Net Cost Savings Per Patient Switched From OAA to PP1M With Subsequent Transitions to PP3M, and PP6M, Among Nonadherent Young Adults

**SUPPLEMENTARY FIGURE 4** Sensitivity Analysis: Net Cost Savings Per Patients Switched From OAA to PP1M Among Nonadherent, Recently Relapsed Adults in Year 1<sup>1</sup>

**SUPPLEMENTARY FIGURE 5** Sensitivity Analysis: Net Cost Savings Per Patients Switched From OAA to PP1M Among Nonadherent, Young Adults in Year 1<sup>1</sup>

**SUPPLEMENTARY FIGURE 6** Sensitivity Analysis: Net Cost Savings Per Patients Switched From OAA to PP1M Among Nonadherent, Recently Relapsed Adults in Year 2<sup>1</sup>

**SUPPLEMENTARY FIGURE 7** Sensitivity Analysis: Net Cost Savings Per Patients Switched From OAA to PP1M Among Nonadherent, Young Adults in Year 2<sup>1</sup>

**SUPPLEMENTARY FIGURE 8** Sensitivity Analysis: Net Cost Savings Per Patients Switched From OAA to PP1M Among Nonadherent, Recently Relapsed Adults in Year 3<sup>1</sup>

**SUPPLEMENTARY FIGURE 9** Sensitivity Analysis: Net Cost Savings Per Patients Switched From OAA to PP1M Among Nonadherent, Young Adults in Year 3<sup>1</sup>

**Supplementary Table 1. Population inputs**

| Population characteristics                                      | Value              |              | Source/Assumptions                                                                                                                                                                                                                                                                                                                                           |
|-----------------------------------------------------------------|--------------------|--------------|--------------------------------------------------------------------------------------------------------------------------------------------------------------------------------------------------------------------------------------------------------------------------------------------------------------------------------------------------------------|
|                                                                 | Overall population |              |                                                                                                                                                                                                                                                                                                                                                              |
| Total population                                                | 1,000,000          |              | Total population, user-defined input                                                                                                                                                                                                                                                                                                                         |
| Prevalence of schizophrenia among Medicaid patients             | 2.7%               |              | Pilon <i>et al.</i> , 2021 <sup>23</sup>                                                                                                                                                                                                                                                                                                                     |
| Population with schizophrenia                                   | 27,000             |              | Calculated based on the prevalence with schizophrenia                                                                                                                                                                                                                                                                                                        |
| Proportion of schizophrenia patients currently treated with OAs | 55.0%              |              | Pilon <i>et al.</i> , 2017 <sup>25</sup>                                                                                                                                                                                                                                                                                                                     |
| Population with schizophrenia, on OAs                           | 14,850             |              | Calculated based on the proportion of population currently treated with OAs assuming that 100% were initially treated with OAs                                                                                                                                                                                                                               |
| Population with schizophrenia, on OAs and nonadherent           | 10,053             |              | Calculated based on the proportion of patients initially nonadherent to OAs assuming that 67.7% of OAA patients are nonadherent over 6 months based on Marcus <i>et al.</i> (2015) which reported that 32.3% of patients initiating an OAA had a PDC value $\geq 80\%$ at 6 months after discharge for a schizophrenia-related hospitalization <sup>13</sup> |
|                                                                 | Recently relapsed  | Young adults |                                                                                                                                                                                                                                                                                                                                                              |

|                                                                               |       |       |                                                                                                                                                                                                                                                                                                                                                                                                                                                                                 |
|-------------------------------------------------------------------------------|-------|-------|---------------------------------------------------------------------------------------------------------------------------------------------------------------------------------------------------------------------------------------------------------------------------------------------------------------------------------------------------------------------------------------------------------------------------------------------------------------------------------|
| Population with schizophrenia, on OAAs and nonadherent, with a recent relapse | 7,454 | -     | Calculated based on proportion of OAAs nonadherent who had a recent relapse assuming that 74.1% of nonadherent patients have had a relapse in the previous 6 months, based on Lafeuille <i>et al.</i> (2013) [3-month hospitalization rate of 0.3511] and adjusted based on Ascher-Svanum <i>et al.</i> (2006) for the ratio of inpatient visits nonadherent/adherent of 1.8865. The 3-month rate was used to calculate the 6-month rate $(0.4915+(0.4915*(1-0.4915)))^{26,27}$ |
| Population with schizophrenia, on OAAs and nonadherent who are young adults   | -     | 4,002 | Calculated based on proportion of OAAs nonadherent who are aged 18-35 years assuming that 39.8% (3,155/7,926) of patients treated with OAAs are aged 18-35 as per Manjelievskaia <i>et al.</i> (2018) <sup>12</sup>                                                                                                                                                                                                                                                             |

**Abbreviations:** OAA = oral atypical antipsychotic, PDC = proportion of days covered.

Supplementary Table 2. Model inputs

| Clinical event | Event                                                               | Recently relapsed | Young adults | Source                                                                                                                          | Notes                                                                                                                                                                                                                                                                                                                                                                                                                                                                                       |
|----------------|---------------------------------------------------------------------|-------------------|--------------|---------------------------------------------------------------------------------------------------------------------------------|---------------------------------------------------------------------------------------------------------------------------------------------------------------------------------------------------------------------------------------------------------------------------------------------------------------------------------------------------------------------------------------------------------------------------------------------------------------------------------------------|
| Adherence      | Probability of adherence, PP1M patients                             | 0.7141            | 0.6449       | Recently relapsed: Marcus <i>et al.</i> , 2015 <sup>13</sup><br>Young adults: Manjelievskaia <i>et al.</i> , 2018 <sup>12</sup> | <b>Recently relapsed:</b> Proportion of Medicaid patients on PP1M with a PDC $\geq$ 0.80 during 6 months after index schizophrenia-related hospitalization was 51.0%. This has been adjusted to 3-month cycles ( $0.714^2=0.51$ )<br><b>Young adults:</b> Proportion of Medicaid patients 18-35 years on PP1M with a PDC $\geq$ 0.80 during 12 months was 19.0%. This has been adjusted by a general/nonadherent ratio of 0.9100 (0.6541/0.7188) and to 3-month cycles ( $0.6449^4=0.173$ ) |
|                | Probability of adherence, OAA patients                              | 0.0000            |              | Assumption                                                                                                                      | The model is restricted to nonadherent OAA population only                                                                                                                                                                                                                                                                                                                                                                                                                                  |
|                | Probability of adherence if patients switch treatments, OAA or PP1M | 0.5683            | 0.6281       | Recently relapsed: Marcus <i>et al.</i> , 2015 <sup>13</sup><br>Young adults: Manjelievskaia <i>et al.</i> , 2018 <sup>12</sup> | <b>Recently relapsed:</b> Proportion of Medicaid patients with a PDC $\geq$ 0.80 during 6 months after index schizophrenia-related hospitalization was 32.3%. This has been adjusted to 3-month cycles ( $0.568^2=0.323$ )<br><b>Young adults:</b> Proportion of Medicaid patients 18-35 years on OA with a PDC $\geq$ 0.80 during 12 months was 17.1%. This has been adjusted by a general/nonadherent ratio of 0.9100 (0.6541/0.7188) and to 3-month cycles ( $0.6281^4=0.156$ )          |

|         |                                                        |        |        |                                                                                                                                                                                                            |                                                                                                                                                                                                                                                                    |
|---------|--------------------------------------------------------|--------|--------|------------------------------------------------------------------------------------------------------------------------------------------------------------------------------------------------------------|--------------------------------------------------------------------------------------------------------------------------------------------------------------------------------------------------------------------------------------------------------------------|
|         | Probability of adherence, transition from PP1M to PP3M | 0.9358 |        | Lin <i>et al.</i> , 2021 <sup>20</sup>                                                                                                                                                                     | Proportion of Medicaid patients on PP3M with a PDC $\geq$ 0.80 during 12 months was 76.7%. This has been adjusted to 3-month cycles (0.9358 <sup>4</sup> =0.767)                                                                                                   |
|         | Probability of adherence, transition to PP6M           | 0.9716 |        | Lin <i>et al.</i> , 2021 <sup>20</sup>                                                                                                                                                                     | Proportion of Medicaid patients on PP3M with a PDC $\geq$ 0.80 during 6 months was 94.4%. This has been adjusted to 3-month cycles (0.9716 <sup>2</sup> =0.944) and is assumed to approximate rates of PP6M adherence                                              |
| Relapse | Probability of relapse, adherent, all patients         | 0.2605 | 0.1646 | Recently relapsed: Lafeuille <i>et al.</i> 2013 <sup>26</sup> , and Ascher-Svanum, 2006 <sup>27</sup><br>Young adults: Young-Xu <i>et al.</i> , 2016 <sup>28</sup> , and Ascher-Svanum, 2006 <sup>27</sup> | Mental disorder-related rehospitalization rates by 3 months among Medicaid, Medicare, and commercially insured patients (recently relapsed) and veterans (young adults) adjusted to account for model rate of adherence and a nonadherent/adherent ratio of 1.8865 |
|         | Probability of relapse, nonadherent, all patients      | 0.4915 | 0.3104 | Recently relapsed: Lafeuille <i>et al.</i> 2013 <sup>26</sup> , and Ascher-Svanum, 2006 <sup>27</sup><br>Young adults: Young-Xu <i>et al.</i> , 2016 <sup>28</sup> , and Ascher-Svanum, 2006 <sup>27</sup> |                                                                                                                                                                                                                                                                    |

|           |                                                               |        |  |             |                                                                                                                                                            |
|-----------|---------------------------------------------------------------|--------|--|-------------|------------------------------------------------------------------------------------------------------------------------------------------------------------|
| Switching | Probability of switching to an OAA, adherent, all patients    | 0.1500 |  | Assumptions | Irrespective of treatment type, assumed those that have a relapse and are adherent would be most likely to switch                                          |
|           | Probability of switching to an OAA, nonadherent, all patients | 0.1000 |  |             | Irrespective of treatment type, assumed those that have a relapse and are nonadherent would be more inclined to switch than those not experiencing relapse |
|           | Probability of switching to an OAA, stable, all patients      | 0.0200 |  |             | Irrespective of treatment type, assumed only a small proportion of patients would switch if they are stable                                                |

|                                                                                |        |                                        |                                                                                                                                                                                                                                                                                                                                                                                                                                                        |
|--------------------------------------------------------------------------------|--------|----------------------------------------|--------------------------------------------------------------------------------------------------------------------------------------------------------------------------------------------------------------------------------------------------------------------------------------------------------------------------------------------------------------------------------------------------------------------------------------------------------|
| Probability of transitioning from PP1M to PP3M, stable, all patients           | 0.1398 | Lin <i>et al.</i> , 2021 <sup>20</sup> | Proportion of Medicaid patients with $\geq 1$ PP3M claim after adequate treatment with PP1M was 15.6% (i.e., $\geq 4$ months of continuous PP1M coverage [no gaps of $>45$ days in PP1M treatment]). The proportion of patients who are eligible has been adjusted to reflect that 89.6% of patients transition as per label <sup>18</sup> . Patients must be stable (i.e., no relapses in the current 3-month cycle) on PP1M before switching to PP3M |
| Probability of transitioning from PP1M to PP6M, stable, all patients           | 0.1322 | Lin <i>et al.</i> , 2021 <sup>20</sup> | Assumed a similar switch rate as that of switching from PP1M to PP3M whereby 15.6% of Medicaid patients had $\geq 1$ PP3M claim after adequate treatment with PP1M (i.e., $\geq 4$ months of continuous PP1M coverage [no gaps of $>45$ days in PP1M treatment]). The eligible proportion switching has been adjusted to reflect the proportion of patients on the two highest PP1M dose                                                               |
| Probability of transitioning from PP3M to PP6M, stable, all patients           | 0.1355 | Lin <i>et al.</i> , 2021 <sup>20</sup> |                                                                                                                                                                                                                                                                                                                                                                                                                                                        |
| Probability of switching from PP6M to PP1M or PP3M, stable, all patients       | 0.0150 | Lin <i>et al.</i> , 2021 <sup>20</sup> | Assumed a similar switch rate as that of switching from PP3M to PP1M. The proportion of Medicaid patients with $\geq 1$ PP1M claim within the year following initiation of PP3M was 22%, adjusted to reflect that 5.5% would switch at any 3-month cycle. Rates have been adjusted to incorporate a probability of switching as that to an OAA,                                                                                                        |
| Probability of switching from PP6M to PP1M or PP3M, relapse, adherent patients | 0.0115 | Lin <i>et al.</i> , 2021 <sup>20</sup> |                                                                                                                                                                                                                                                                                                                                                                                                                                                        |

|                                                                                   |        |                                        |                                                            |
|-----------------------------------------------------------------------------------|--------|----------------------------------------|------------------------------------------------------------|
|                                                                                   |        |                                        | dependent on both prior cycle adherence and relapse status |
| Probability of switching from PP6M to PP1M or PP3M, relapse, nonadherent patients | 0.0775 | Lin <i>et al.</i> , 2021 <sup>20</sup> |                                                            |

**Abbreviations:** PDC = proportion of days covered, PP1M = once-monthly paliperidone palmitate, PP3M = once-every-three-months paliperidone palmitate, PP6M = once-every-six-months paliperidone palmitate, OAA = oral atypical antipsychotic.



**Supplementary Table 3. Cost inputs**

| <b>Input</b>                                   | <b>Price</b> | <b>Source/Note</b>                                                                                                                                                                                                                                                                                                                                                                                                                                                                                   |
|------------------------------------------------|--------------|------------------------------------------------------------------------------------------------------------------------------------------------------------------------------------------------------------------------------------------------------------------------------------------------------------------------------------------------------------------------------------------------------------------------------------------------------------------------------------------------------|
| <b>PP1M<sup>1,2,3</sup></b>                    |              |                                                                                                                                                                                                                                                                                                                                                                                                                                                                                                      |
| Initiation regimen of 234 mg                   | \$2,940      |                                                                                                                                                                                                                                                                                                                                                                                                                                                                                                      |
| Additional administration 7 days later, 156 mg | \$1,960      |                                                                                                                                                                                                                                                                                                                                                                                                                                                                                                      |
| Month 1 PP1M Cost                              | \$4,900      |                                                                                                                                                                                                                                                                                                                                                                                                                                                                                                      |
| Monthly Maintenance dose                       | \$2,386      | Maintenance doses based on PP1M dosing distributions observed in Lin <i>et al.</i> , 2021. <sup>20</sup>                                                                                                                                                                                                                                                                                                                                                                                             |
| <b>PP3M<sup>1,2,3</sup></b>                    | \$2,434      | Doses based on PP3M dosing distributions observed in Lin <i>et al.</i> , 2021. <sup>20</sup>                                                                                                                                                                                                                                                                                                                                                                                                         |
| <b>PP6M<sup>1,2,3</sup></b>                    | \$2,583      | Doses based on PP3M dosing distributions observed in Lin <i>et al.</i> , 2021. <sup>20</sup>                                                                                                                                                                                                                                                                                                                                                                                                         |
| <b>OAA monthly cost<sup>1,3</sup></b>          | \$313        | <p>The average monthly cost of OAAs was calculated as a weighted cost of an OAA case mix, including aripiprazole, asenapine maleate, iloperidone, lurasidone, olanzapine, paliperidone, quetiapine, risperidone and ziprasidone. Frequency of dose was obtained from FDA prescribing information or APA guidelines.<sup>5</sup></p> <p>Each agent was weighted to contribute to the OAA case mix based on medication utilization frequencies reported in Pilon <i>et al.</i>, 2017.<sup>35</sup></p> |
| <b>Relapse cost<sup>4</sup></b>                | \$23,283     |                                                                                                                                                                                                                                                                                                                                                                                                                                                                                                      |
| Average cost for initial inpatient stay        | \$10,711     | Average cost for an inpatient stay, based upon weighted average of schizophrenia                                                                                                                                                                                                                                                                                                                                                                                                                     |

|                                                               |          |                                                                                                                                                                                                                                                                                                                                          |
|---------------------------------------------------------------|----------|------------------------------------------------------------------------------------------------------------------------------------------------------------------------------------------------------------------------------------------------------------------------------------------------------------------------------------------|
|                                                               |          | diagnoses codes (ICD-9 codes: 295.xx) as per HCUP. <sup>36</sup>                                                                                                                                                                                                                                                                         |
| Average cost for a readmission within 30 days                 | \$2,070  | Within 30 days, 18.6% of initial inpatient stays for schizophrenia are readmitted with any diagnosis of schizophrenia (average cost per readmission: \$8,600) as per HCUP. <sup>37</sup>                                                                                                                                                 |
| Average cost for outpatient and other medical ancillary costs | \$10,502 | Outpatient/other medical ancillary costs and institutional visit costs represent 43.3% and 52.7% of mean relapse-related weekly costs (relative to baseline period), respectively. Used a ratio of 43.3%/52.7% to reflect costs for outpatient and other medical ancillary services, as per Lafeuille <i>et al.</i> , 2013. <sup>4</sup> |

**Abbreviations:** APA = American Psychiatric Association, FDA = Food and Drug Administration, HCUP = Healthcare Cost and Utilization Project, ICD-9 = International Classification of Diseases, 9th Revision, PDC = proportion of days covered; PP1M = once-monthly paliperidone palmitate, PP3M = once-every-three-months paliperidone palmitate, PP6M = once-every-six-months paliperidone palmitate, OAA = oral atypical antipsychotic.

**Notes:**

1. Treatment costs are based on the wholesale acquisition cost (WAC) Pkg Price from Redbook, accessed Jan 10, 2022.
2. For PP1M and PP3M, a 70% treatment discount, considering both statutory and inflation discounts, was applied to the WAC package price based on the literature;<sup>30</sup> for PP6M, a statutory 23.1% minimum discount was applied,<sup>31</sup> and the inflation discount was conservatively assumed to be 10% less than of that of PP1M and PP3M, as PP6M is a newer product.
3. Treatment costs were adjusted to reflect adherence status such that across treatments, treatment costs were assumed 90% among adherent patients. Incorporating this assumption, as well as the mean PDC and proportion of patients treated with OAAs and

PP1M who were adherent from Pilon *et al.*, 2017,<sup>25</sup> the weighted average of PDC among nonadherent patients was estimated as 0.387. Specifically:

$$0.387 = (((0.57-(0.33*0.9))/(1-0.33))*(2182/23537))+((0.53-(0.281*0.9))/(1-0.281))*(21,355/23,537))$$

4. Relapse costs have been inflated to 2021 using the Medical Care Component of the Consumer Price Index.

**Supplementary Table 4. Costs and relapses associated with switching nonadherent recently relapsed adults with schizophrenia from an OAA to PP1M, with subsequent transitions to PP3M and PP6M**

|                            | Transitions to PP1M only                                 |                       |                                                 |                                     | Transitions to PP1M, PP3M, and PP6M              |                                  |                                                                    |                                  |                                                                 |                                     |
|----------------------------|----------------------------------------------------------|-----------------------|-------------------------------------------------|-------------------------------------|--------------------------------------------------|----------------------------------|--------------------------------------------------------------------|----------------------------------|-----------------------------------------------------------------|-------------------------------------|
|                            | Existing population<br>(N=7,454; all patients on<br>OAA) |                       | Switching 5% (N=373) of<br>OAA patients to PP1M |                                     | Switching 10% (N=745) of<br>OAA patients to PP1M |                                  | Switching 5% (N=373) of<br>OAA patients to PP1M,<br>PP3M, and PP6M |                                  | Switching 10% (N=745)<br>of OAA patients to PP1M,<br>PP3M, PP6M |                                     |
|                            | Costs                                                    | Number of<br>relapses | Costs                                           | Number<br>of<br>relapses<br>avoided | Costs                                            | Number of<br>relapses<br>avoided | Costs                                                              | Number of<br>relapses<br>avoided | Costs                                                           | Number<br>of<br>relapses<br>avoided |
| <b>Relapse costs</b>       |                                                          |                       |                                                 |                                     |                                                  |                                  |                                                                    |                                  |                                                                 |                                     |
| Year 1                     | \$333,404,919                                            | 14,320                | \$328,162,579                                   | 225                                 | \$322,920,240                                    | 450                              | \$327,901,407                                                      | 236                              | \$322,397,895                                                   | 472                                 |
| Year 2                     | \$315,321,172                                            | 13,543                | \$311,202,330                                   | 177                                 | \$307,083,488                                    | 354                              | \$310,304,305                                                      | 216                              | \$305,287,439                                                   | 431                                 |
| Year 3                     | \$301,161,406                                            | 12,935                | \$297,925,137                                   | 139                                 | \$294,688,868                                    | 278                              | \$296,986,974                                                      | 179                              | \$292,812,542                                                   | 359                                 |
| <b>Total relapse costs</b> | <b>\$949,887,497</b>                                     | <b>40,798</b>         | <b>\$937,290,047</b>                            | <b>541</b>                          | <b>\$924,692,596</b>                             | <b>1,082</b>                     | <b>\$935,192,686</b>                                               | <b>631</b>                       | <b>\$920,497,876</b>                                            | <b>1,262</b>                        |
| <b>Treatment costs</b>     |                                                          |                       |                                                 |                                     |                                                  |                                  |                                                                    |                                  |                                                                 |                                     |
| Year 1                     | \$11,412,345                                             |                       | \$13,343,706                                    |                                     | \$15,275,067                                     |                                  | \$13,479,454                                                       |                                  | \$15,546,563                                                    |                                     |
| Year 2                     | \$13,042,640                                             |                       | \$14,406,875                                    |                                     | \$15,771,110                                     |                                  | \$14,934,616                                                       |                                  | \$16,826,592                                                    |                                     |
| Year 3                     | \$14,319,178                                             |                       | \$15,401,354                                    |                                     | \$16,483,530                                     |                                  | \$15,988,013                                                       |                                  | \$17,656,848                                                    |                                     |

|                               |                      |                      |                      |                      |                      |
|-------------------------------|----------------------|----------------------|----------------------|----------------------|----------------------|
| <b>Total treatment costs</b>  | \$38,774,163         | \$43,151,935         | \$47,529,707         | \$44,402,083         | \$50,030,004         |
| <b>Total plan level costs</b> | <b>\$988,661,660</b> | <b>\$980,441,982</b> | <b>\$972,222,304</b> | <b>\$979,594,770</b> | <b>\$970,527,880</b> |

---

**Supplementary Table 5. Costs and relapses associated with switching nonadherent, recently relapsed patients with schizophrenia from an OAA to PP1M, with subsequent transitions to PP3M and PP6M, based on number of relapses**

|                               | Existing population<br>(N=7,454; all patients on OAA) |                  |                    | Transitions to PP1M only                        |                           |                            | Transitions to PP1M, PP3M, and PP6M                             |                           |                            |
|-------------------------------|-------------------------------------------------------|------------------|--------------------|-------------------------------------------------|---------------------------|----------------------------|-----------------------------------------------------------------|---------------------------|----------------------------|
|                               |                                                       |                  |                    | Switching 50% (N=3,727) of OAA patients to PP1M |                           |                            | Switching 50% (N=3,727) of OAA patients to PP1M, PP3M, and PP6M |                           |                            |
|                               | Costs                                                 | Cost per patient | Number of relapses | Costs                                           | Cost per patient switched | Number of relapses avoided | Costs                                                           | Cost per patient switched | Number of relapses avoided |
| <b>Relapse costs</b>          |                                                       |                  |                    |                                                 |                           |                            |                                                                 |                           |                            |
| Year 1                        | \$333,404,919                                         | \$44,729         | 14,320             | \$280,981,525                                   | \$30,663                  | 2,252                      | \$278,369,799                                                   | \$29,962                  | 2,364                      |
| Year 2                        | \$315,321,172                                         | \$42,303         | 13,543             | \$274,132,754                                   | \$31,251                  | 1,769                      | \$265,152,507                                                   | \$28,842                  | 2,155                      |
| Year 3                        | \$301,161,406                                         | \$40,403         | 12,935             | \$268,798,716                                   | \$31,720                  | 1,390                      | \$259,417,087                                                   | \$29,203                  | 1,793                      |
| <b>Total relapse costs</b>    | \$949,887,497                                         |                  | 40,798             | \$823,912,995                                   |                           | 5,411                      | \$802,939,393                                                   |                           | 6,312                      |
| <b>Treatment costs</b>        |                                                       |                  |                    |                                                 |                           |                            |                                                                 |                           |                            |
| Year 1                        | \$11,412,345                                          | \$1,531          |                    | \$30,725,952                                    | \$6,713                   |                            | \$32,083,434                                                    | \$7,077                   |                            |
| Year 2                        | \$13,042,640                                          | \$1,750          |                    | \$26,684,993                                    | \$5,410                   |                            | \$31,962,401                                                    | \$6,826                   |                            |
| Year 3                        | \$14,319,178                                          | \$1,921          |                    | \$25,140,939                                    | \$4,825                   |                            | \$31,007,530                                                    | \$6,399                   |                            |
| <b>Total treatment costs</b>  | \$38,774,163                                          |                  |                    | \$82,551,884                                    |                           |                            | \$95,053,365                                                    |                           |                            |
| <b>Total plan level costs</b> | <b>\$988,661,660</b>                                  |                  |                    | <b>\$906,464,879</b>                            |                           |                            | <b>\$897,992,758</b>                                            |                           |                            |

|                               | Existing population<br>(N=7,454; all patients on OAA) |          |        | Switching patients to PP1M after the first<br>subsequent relapse |          |       | Switching patients to PP1M after the first<br>subsequent relapse |          |       |
|-------------------------------|-------------------------------------------------------|----------|--------|------------------------------------------------------------------|----------|-------|------------------------------------------------------------------|----------|-------|
| <b>Relapse costs</b>          |                                                       |          |        |                                                                  |          |       |                                                                  |          |       |
| Year 1                        | \$333,404,919                                         | \$44,729 | 14,320 | \$307,185,611                                                    | \$41,780 | 1,126 | \$306,698,242                                                    | \$41,629 | 1,147 |
| Year 2                        | \$315,321,172                                         | \$42,303 | 13,543 | \$274,795,889                                                    | \$31,644 | 1,741 | \$268,288,052                                                    | \$29,880 | 2,020 |
| Year 3                        | \$301,161,406                                         | \$40,403 | 12,935 | \$268,028,059                                                    | \$31,534 | 1,422 | \$258,761,683                                                    | \$29,045 | 1,820 |
| <b>Total relapse costs</b>    | \$949,887,497                                         |          | 40,798 | \$850,009,559                                                    |          | 4,289 | \$833,747,977                                                    |          | 4,987 |
| <b>Treatment costs</b>        |                                                       |          |        |                                                                  |          |       |                                                                  |          |       |
| Year 1                        | \$11,412,345                                          | \$1,531  |        | \$22,400,860                                                     | \$4,936  |       | \$22,639,972                                                     | \$5,010  |       |
| Year 2                        | \$13,042,640                                          | \$1,750  |        | \$27,641,146                                                     | \$5,708  |       | \$31,302,280                                                     | \$6,700  |       |
| Year 3                        | \$14,319,178                                          | \$1,921  |        | \$26,199,316                                                     | \$5,112  |       | \$31,842,039                                                     | \$6,627  |       |
| <b>Total treatment costs</b>  | \$38,774,163                                          |          |        | \$76,241,322                                                     |          |       | \$85,784,291                                                     |          |       |
| <b>Total plan level costs</b> | <b>\$988,661,660</b>                                  |          |        | <b>\$926,250,881</b>                                             |          |       | <b>\$919,532,268</b>                                             |          |       |

**Supplementary Table 6. Costs and relapses associated with switching nonadherent, young adult patients with schizophrenia from an OAA to PP1M, with subsequent transitions to PP3M and PP6M**

|                            | Transitions to PP1M only                                 |                       |                                                 |                                     | Transitions to PP1M, PP3M, and PP6M              |                                  |                                                                    |                                  |                                                                 |                                     |
|----------------------------|----------------------------------------------------------|-----------------------|-------------------------------------------------|-------------------------------------|--------------------------------------------------|----------------------------------|--------------------------------------------------------------------|----------------------------------|-----------------------------------------------------------------|-------------------------------------|
|                            | Existing population<br>(N=7,454; all patients on<br>OAA) |                       | Switching 5% (N=200) of<br>OAA patients to PP1M |                                     | Switching 10% (N=400) of<br>OAA patients to PP1M |                                  | Switching 5% (N=200) of<br>OAA patients to PP1M,<br>PP3M, and PP6M |                                  | Switching 10% (N=400)<br>of OAA patients to PP1M,<br>PP3M, PP6M |                                     |
|                            | Costs                                                    | Number of<br>relapses | Costs                                           | Number<br>of<br>relapses<br>avoided | Costs                                            | Number of<br>relapses<br>avoided | Costs                                                              | Number of<br>relapses<br>avoided | Costs                                                           | Number<br>of<br>relapses<br>avoided |
| <b>Relapse costs</b>       |                                                          |                       |                                                 |                                     |                                                  |                                  |                                                                    |                                  |                                                                 |                                     |
| Year 1                     | \$113,458,675                                            | 4,873                 | \$111,820,698                                   | 70                                  | \$110,182,722                                    | 140                              | \$111,691,143                                                      | 76                               | \$109,923,612                                                   | 152                                 |
| Year 2                     | \$108,110,879                                            | 4,643                 | \$106,747,136                                   | 59                                  | \$105,383,394                                    | 117                              | \$106,296,302                                                      | 78                               | \$104,481,725                                                   | 156                                 |
| Year 3                     | \$103,659,507                                            | 4,452                 | \$102,524,083                                   | 49                                  | \$101,388,659                                    | 98                               | \$102,041,442                                                      | 69                               | \$100,423,377                                                   | 139                                 |
| <b>Total relapse costs</b> | <b>\$325,229,060</b>                                     | <b>13,968</b>         | <b>\$321,091,917</b>                            | <b>178</b>                          | <b>\$316,954,774</b>                             | <b>355</b>                       | <b>\$320,028,887</b>                                               | <b>223</b>                       | <b>\$314,828,714</b>                                            | <b>447</b>                          |
| <b>Treatment costs</b>     |                                                          |                       |                                                 |                                     |                                                  |                                  |                                                                    |                                  |                                                                 |                                     |
| Year 1                     | \$6,068,007                                              |                       | \$7,060,353                                     |                                     | \$8,052,700                                      |                                  | \$7,154,293                                                        |                                  | \$8,240,579                                                     |                                     |
| Year 2                     | \$6,831,855                                              |                       | \$7,572,936                                     |                                     | \$8,314,017                                      |                                  | \$7,941,634                                                        |                                  | \$9,051,412                                                     |                                     |
| Year 3                     | \$7,467,663                                              |                       | \$8,088,792                                     |                                     | \$8,709,921                                      |                                  | \$8,513,535                                                        |                                  | \$9,559,407                                                     |                                     |



|                               |                      |                      |                      |                      |                      |
|-------------------------------|----------------------|----------------------|----------------------|----------------------|----------------------|
| <b>Total treatment costs</b>  | \$20,367,525         | \$22,722,081         | \$25,076,637         | \$23,609,462         | \$26,851,399         |
| <b>Total plan level costs</b> | <b>\$345,596,585</b> | <b>\$343,813,998</b> | <b>\$342,031,412</b> | <b>\$343,638,349</b> | <b>\$341,680,113</b> |

---

**Abbreviations:** OAA = oral atypical antipsychotic, PP1M = once-monthly paliperidone palmitate, PP3M = once-every-three-months paliperidone palmitate, PP6M = once-every-six-months paliperidone palmitate.

**Supplementary Table 7. Costs and relapses associated with switching nonadherent, young adult patients with schizophrenia from an OAA to PP1M, with subsequent transitions to PP3M and PP6M, based on number of relapses**

|                               | Existing population<br>(N=4,002; all patients on OAA) |                  |                    | Transitions to PP1M only<br>Switching 50% (N=2,001) of OAA patients to PP1M |                           |                            | Transitions to PP1M, PP3M, and PP6M<br>Switching 50% (N=2,001) of OAA patients to PP1M, PP3M, and PP6M |                           |                            |
|-------------------------------|-------------------------------------------------------|------------------|--------------------|-----------------------------------------------------------------------------|---------------------------|----------------------------|--------------------------------------------------------------------------------------------------------|---------------------------|----------------------------|
|                               | Costs                                                 | Cost per patient | Number of relapses | Costs                                                                       | Cost per patient switched | Number of relapses avoided | Costs                                                                                                  | Cost per patient switched | Number of relapses avoided |
| <b>Relapse costs</b>          |                                                       |                  |                    |                                                                             |                           |                            |                                                                                                        |                           |                            |
| Year 1                        | \$113,458,675                                         | \$28,352         | 4,873              | \$97,078,909                                                                | \$20,165                  | 704                        | \$95,783,359                                                                                           | \$19,518                  | 759                        |
| Year 2                        | \$108,110,879                                         | \$27,015         | 4,643              | \$94,473,454                                                                | \$20,200                  | 586                        | \$89,965,110                                                                                           | \$17,947                  | 779                        |
| Year 3                        | \$103,659,507                                         | \$25,903         | 4,452              | \$92,305,268                                                                | \$20,228                  | 488                        | \$87,478,859                                                                                           | \$17,816                  | 695                        |
| <b>Total relapse costs</b>    | \$325,229,060                                         |                  | 13,968             | \$283,857,631                                                               |                           | 1,778                      | \$273,227,328                                                                                          |                           | 2,233                      |
| <b>Treatment costs</b>        |                                                       |                  |                    |                                                                             |                           |                            |                                                                                                        |                           |                            |
| Year 1                        | \$6,068,007                                           | \$1,516          |                    | \$15,991,473                                                                | \$6,476                   |                            | \$16,930,869                                                                                           | \$6,945                   |                            |
| Year 2                        | \$6,831,855                                           | \$1,707          |                    | \$14,242,664                                                                | \$5,411                   |                            | \$17,929,642                                                                                           | \$7,254                   |                            |
| Year 3                        | \$7,467,663                                           | \$1,866          |                    | \$13,678,952                                                                | \$4,970                   |                            | \$17,926,385                                                                                           | \$7,093                   |                            |
| <b>Total treatment costs</b>  | \$20,367,525                                          |                  |                    | \$43,913,088                                                                |                           |                            | \$52,786,896                                                                                           |                           |                            |
| <b>Total plan level costs</b> | <b>\$345,596,585</b>                                  |                  |                    | <b>\$327,770,719</b>                                                        |                           |                            | <b>\$326,014,224</b>                                                                                   |                           |                            |
|                               | Existing population<br>(N=4,002; all patients on OAA) |                  |                    | Switching patients to PP1M after the first relapse                          |                           |                            | Switching patients to PP1M after the first relapse                                                     |                           |                            |

**Relapse costs**

|                            |                      |          |               |                      |          |              |                      |          |              |
|----------------------------|----------------------|----------|---------------|----------------------|----------|--------------|----------------------|----------|--------------|
| Year 1                     | \$113,458,675        | \$28,352 | 4,873         | \$108,083,559        | \$34,575 | 231          | \$107,930,781        | \$34,462 | 237          |
| Year 2                     | \$108,110,879        | \$27,015 | 4,643         | \$96,970,133         | \$22,545 | 478          | \$94,461,942         | \$21,194 | 586          |
| Year 3                     | \$103,659,507        | \$25,903 | 4,452         | \$92,800,827         | \$20,685 | 465          | \$88,517,719         | \$18,511 | 649          |
| <b>Total relapse costs</b> | <b>\$325,229,060</b> |          | <b>13,968</b> | <b>\$297,854,520</b> |          | <b>1,174</b> | <b>\$290,910,442</b> |          | <b>1,472</b> |

**Treatment costs**

|                               |                      |         |  |                      |         |  |                      |         |  |
|-------------------------------|----------------------|---------|--|----------------------|---------|--|----------------------|---------|--|
| Year 1                        | \$6,068,007          | \$1,516 |  | \$10,139,858         | \$4,547 |  | \$10,245,208         | \$4,626 |  |
| Year 2                        | \$6,831,855          | \$1,707 |  | \$13,951,214         | \$5,554 |  | \$15,898,357         | \$6,603 |  |
| Year 3                        | \$7,467,663          | \$1,866 |  | \$14,159,407         | \$5,268 |  | \$17,763,424         | \$7,098 |  |
| <b>Total treatment costs</b>  | <b>\$20,367,525</b>  |         |  | <b>\$38,250,479</b>  |         |  | <b>\$43,906,989</b>  |         |  |
| <b>Total plan level costs</b> | <b>\$345,596,585</b> |         |  | <b>\$336,104,998</b> |         |  | <b>\$334,817,431</b> |         |  |

---

**Abbreviations:** OAA = oral atypical antipsychotic; PP1M = once-monthly paliperidone palmitate; PP3M = once-every-three-months paliperidone palmitate; PP6M = once-every-six-months paliperidone palmitate.

**Supplementary Figure 1. Distribution of Medicaid patients with schizophrenia (N=27,000) based on treatment with and adherence to OAs, presence of a recent relapse, and age category**

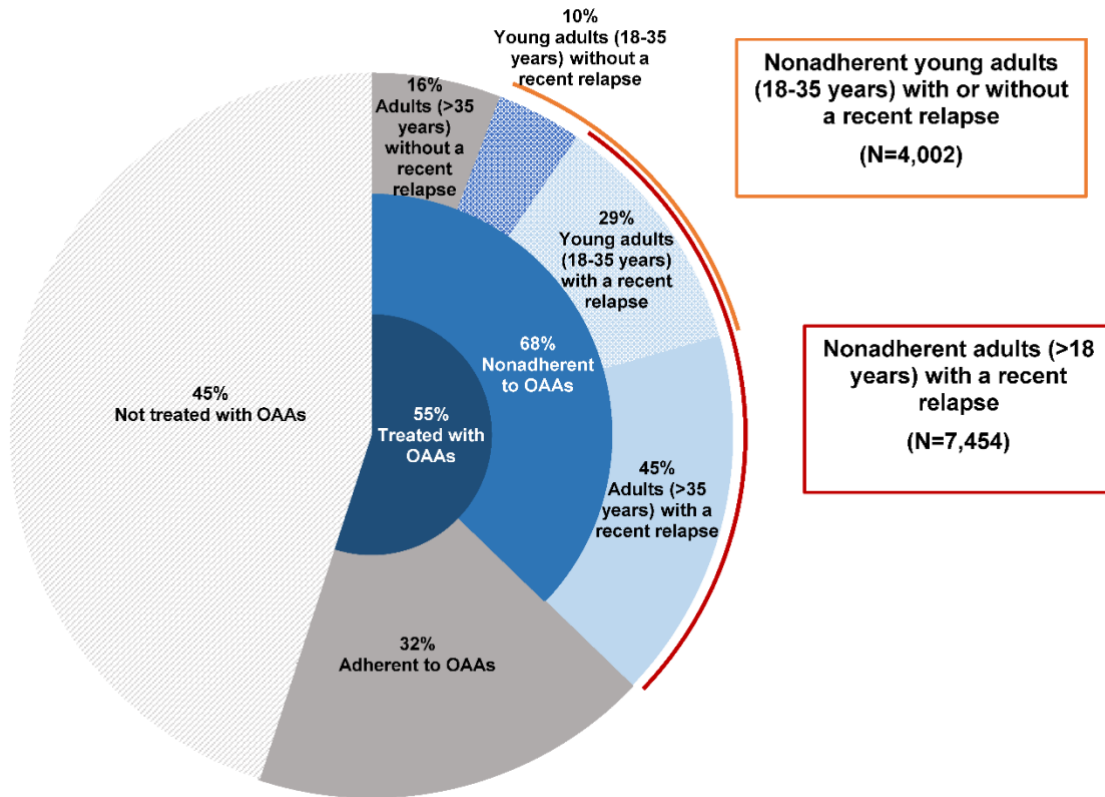

**Supplementary Figure 2. Net cost savings per patient switched from OAA to PP1M with subsequent transitions to PP3M, and PP6M, among nonadherent, recently relapsed adults**

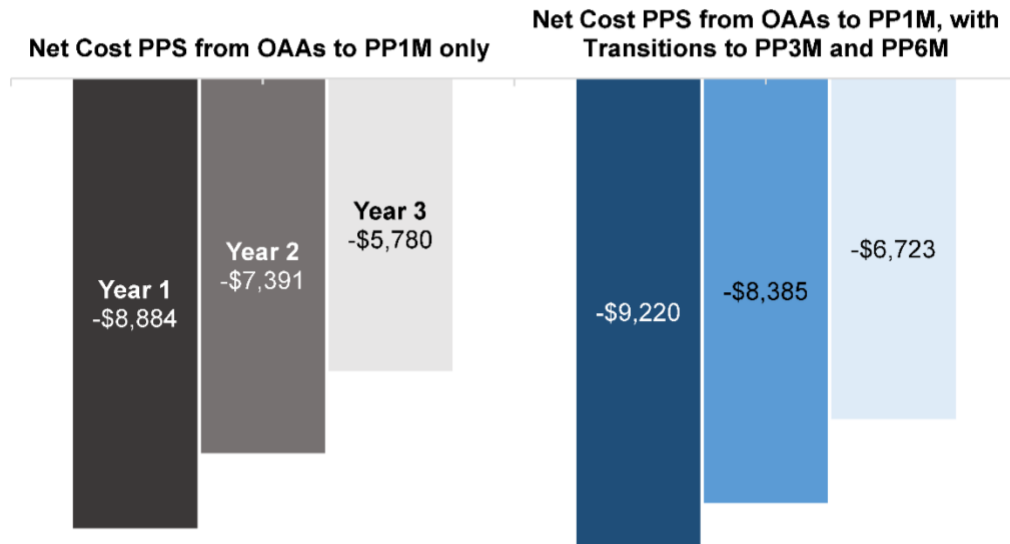

**Abbreviations:** OAA = oral atypical antipsychotic, PP1M = once-monthly paliperidone palmitate, PP3M = once-every-three-months paliperidone palmitate, PP6M once-every-six-months paliperidone palmitate; PPS = per patient switched.

**Supplementary Figure 3. Net cost savings per patient switched from OAA to PP1M with subsequent transitions to PP3M, and PP6M, among nonadherent young adults**

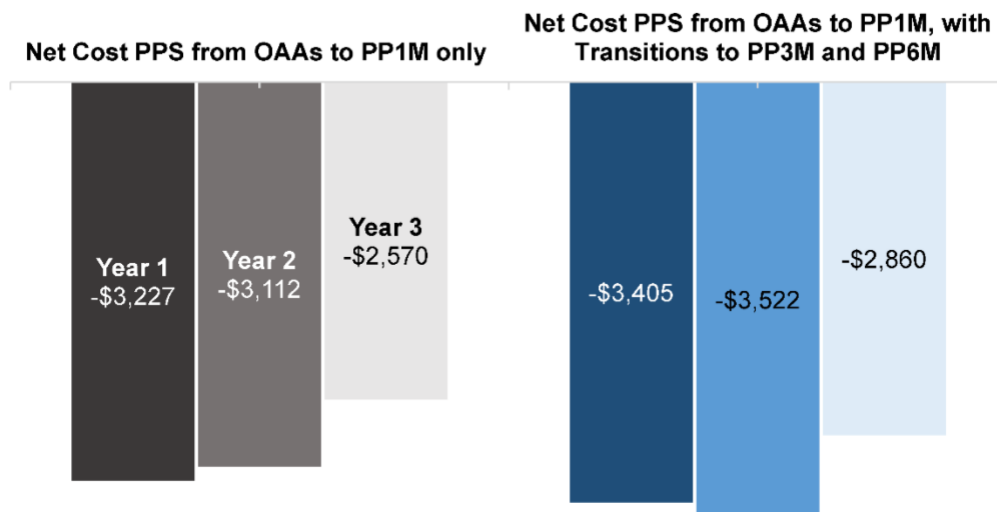

**Abbreviations:** OAA = oral atypical antipsychotic, PP1M = once-monthly paliperidone palmitate, PP3M = once-every-three-months paliperidone palmitate, PP6M once-every-six-months paliperidone palmitate; PPS = per patient switched.

Supplementary Figure 4. Sensitivity analysis: Net cost savings per patients switched from OAA to PP1M among nonadherent, recently relapsed adults in year 1<sup>1</sup>

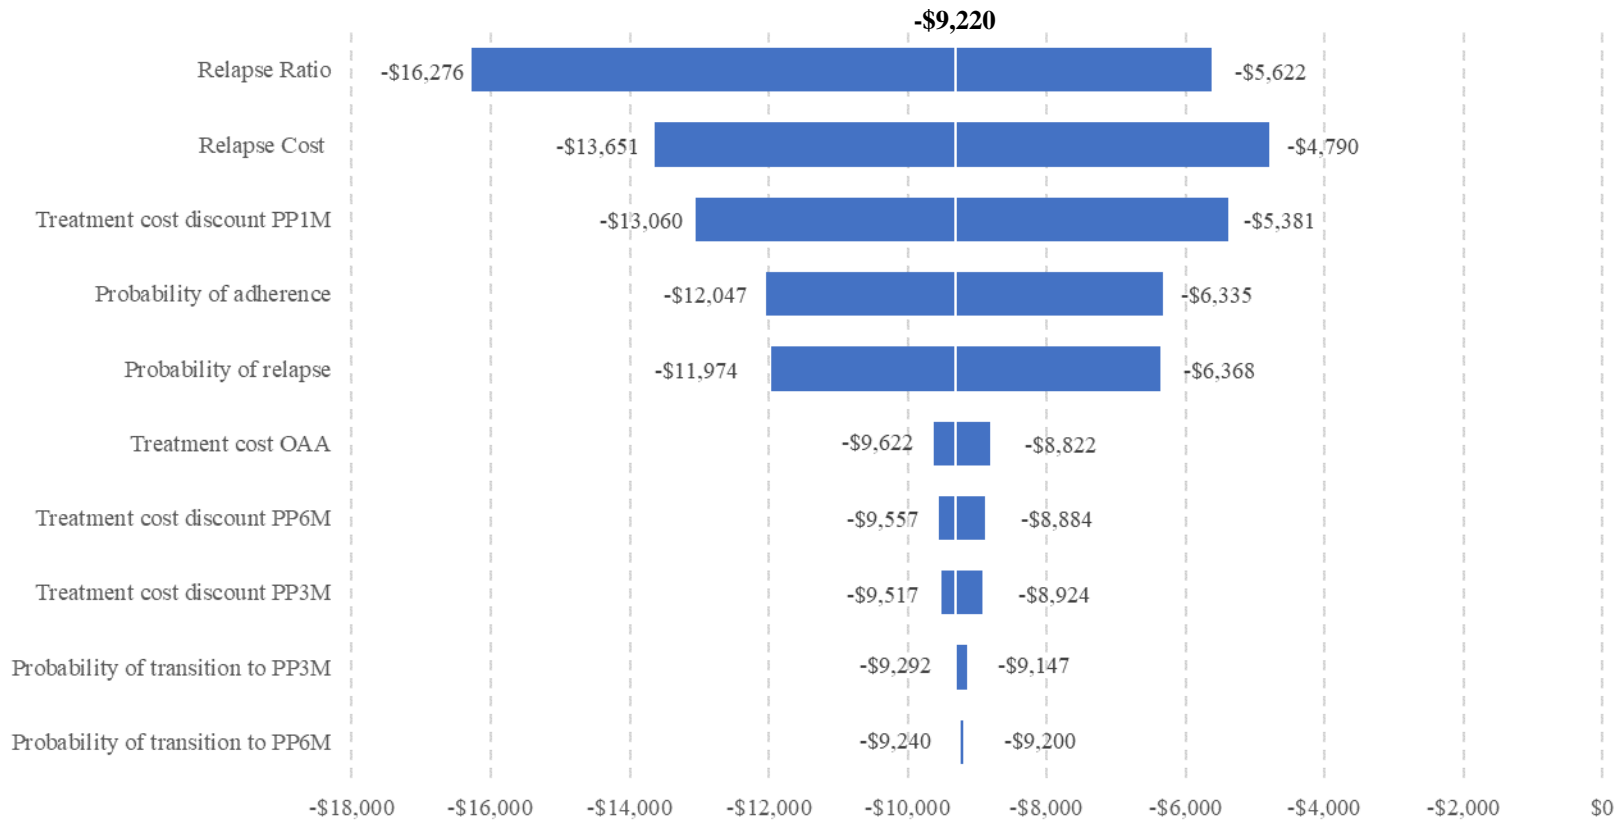

**Abbreviations:** OAA = oral atypical antipsychotic, PP1M = once-monthly paliperidone palmitate, PP3M = once-every-three-months paliperidone palmitate, PP6M once-every-six-months paliperidone palmitate.

**Note:**

1. Upper and lower bounds for each input used in the OSA are as follows: Probability of adherence, PP1M (0.4999, 0.9284); Probability of adherence, OAA (0.3978, 0.7388); Probability of adherence, PP3M (0.6551, 1.0000); Probability of adherence, PP6M (0.6801, 1.0000); Probability of rehospitalization for the relapse ratio, adherent (0.2165, 0.2828); Probability of rehospitalization for the relapse ratio, non-adherent (0.4570, 0.5596); Probability of relapse, adherent (0.2084, 0.3126); Probability of relapse, non-adherent (0.3932, 0.5897); Probability of transition to PP3M (0.0979, 0.1817); Probability of transition to PP6M (0.0925, 0.1719); Treatment cost discount, PP1M (50%, 90%); Treatment cost discount, PP3M (50%, 90%); Treatment cost discount, PP6M (40%, 80%); Cost of relapse (\$16,298, \$30,268); Cost of OAA monthly (\$219, \$407).



**Supplementary Figure 5. Sensitivity analysis: Net cost savings per patients switched from OAA to PP1M among nonadherent, young adults in year 1<sup>1</sup>**

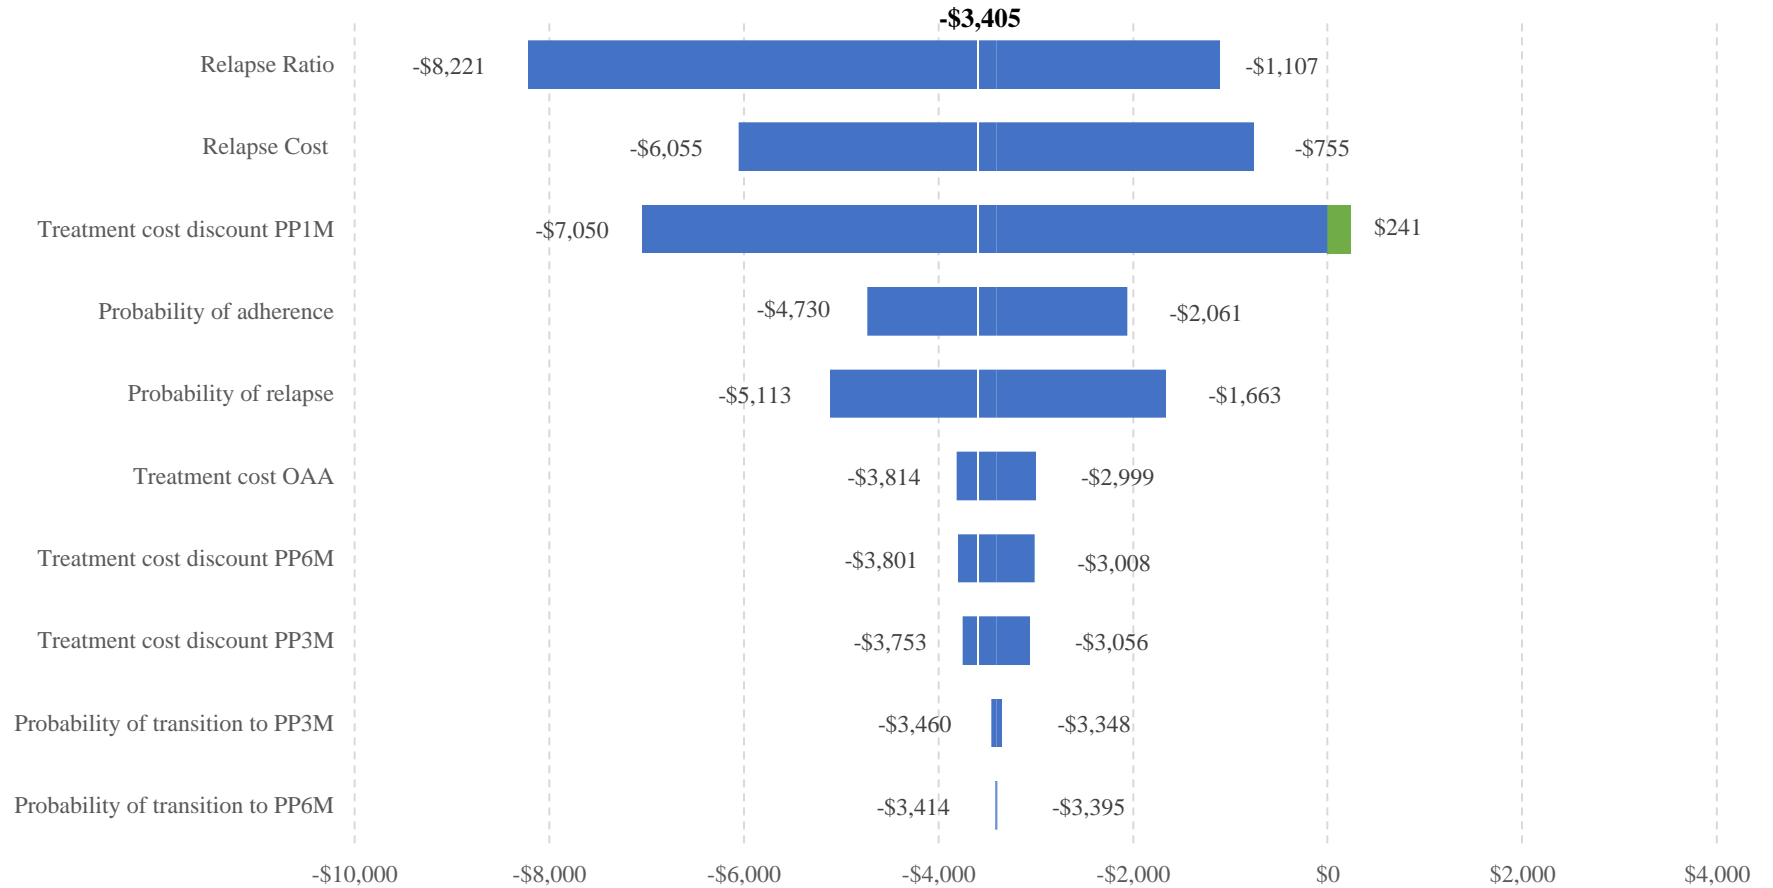

**Abbreviations:** OAA = oral atypical antipsychotic, PP1M = once-monthly paliperidone palmitate, PP3M = once-every-three-months paliperidone palmitate, PP6M once-every-six-months paliperidone palmitate.

**Note:**

1. Upper and lower bounds for each input used in the OSA are as follows: Probability of adherence, PP1M (0.4514, 0.8384); Probability of adherence, OAA (0.4397, 0.8165); Probability of adherence, PP3M (0.6551, 1.0000); Probability of adherence, PP6M (0.6801, 1.0000); Probability of rehospitalization for the relapse ratio, adherent (0.1430, 0.1748); Probability of rehospitalization for the relapse ratio, non-adherent (0.2824, 0.3697); Probability of relapse, adherent (0.1316, 0.1975); Probability of relapse, non-adherent (0.2483, 0.3725); Probability of transition to PP3M (0.0979, 0.1817); Probability of transition to PP6M (0.0925, 0.1719); Treatment cost discount, PP1M (50%, 90%); Treatment cost discount, PP3M (50%, 90%); Treatment cost discount, PP6M (40%, 80%); Cost of relapse (\$16,298, \$30,268); Cost of OAA monthly (\$219, \$407).

**Supplementary Figure 6. Sensitivity analysis: Net cost savings per patients switched from OAA to PP1M among nonadherent, recently relapsed adults in year 2<sup>1</sup>**

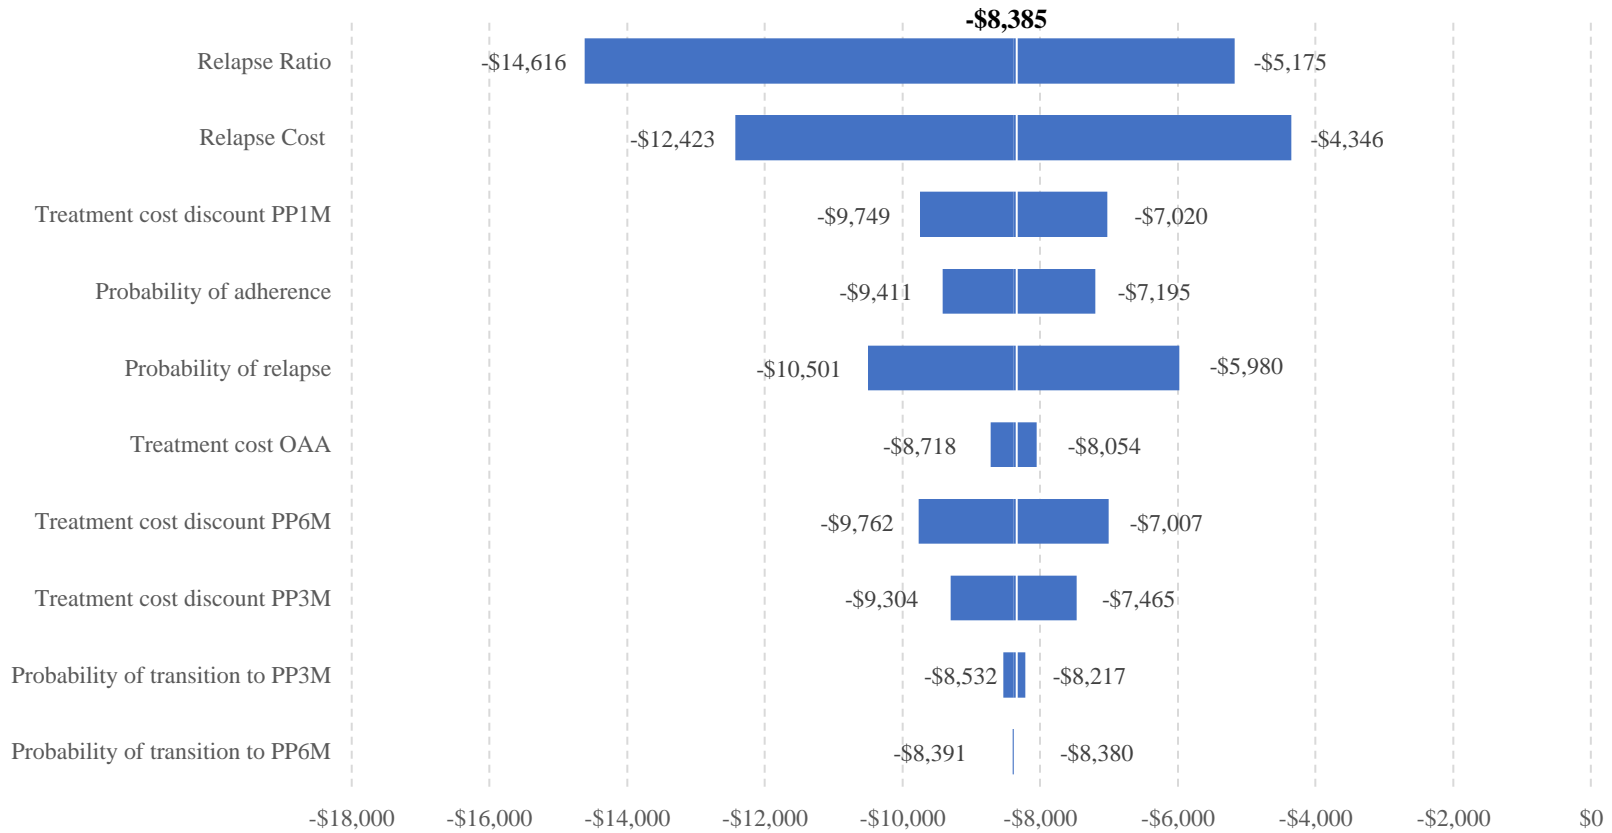

**Abbreviations:** OAA = oral atypical antipsychotic, PP1M = once-monthly paliperidone palmitate, PP3M = once-every-three-months paliperidone palmitate, PP6M once-every-six-months paliperidone palmitate.

**Note:**

1. Upper and lower bounds for each input used in the OSA are as follows: Probability of adherence, PP1M (0.4999, 0.9284); Probability of adherence, OAA (0.3978, 0.7388); Probability of adherence, PP3M (0.6551, 1.0000); Probability of adherence, PP6M (0.6801, 1.0000); Probability of rehospitalization for the relapse ratio, adherent (0.2165, 0.2828); Probability of rehospitalization for the relapse ratio, non-adherent (0.4570, 0.5596); Probability of relapse, adherent (0.2084, 0.3126); Probability of relapse, non-adherent (0.3932, 0.5897); Probability of transition to PP3M (0.0979, 0.1817); Probability of transition to PP6M (0.0925, 0.1719); Treatment cost discount, PP1M (50%, 90%); Treatment cost discount, PP3M (50%, 90%); Treatment cost discount, PP6M (40%, 80%); Cost of relapse (\$16,298, \$30,268); Cost of OAA monthly (\$219, \$407).

**Supplementary Figure 7. Sensitivity analysis: Net cost savings per patients switched from OAA to PP1M among nonadherent, young adults in year 2<sup>1</sup>**

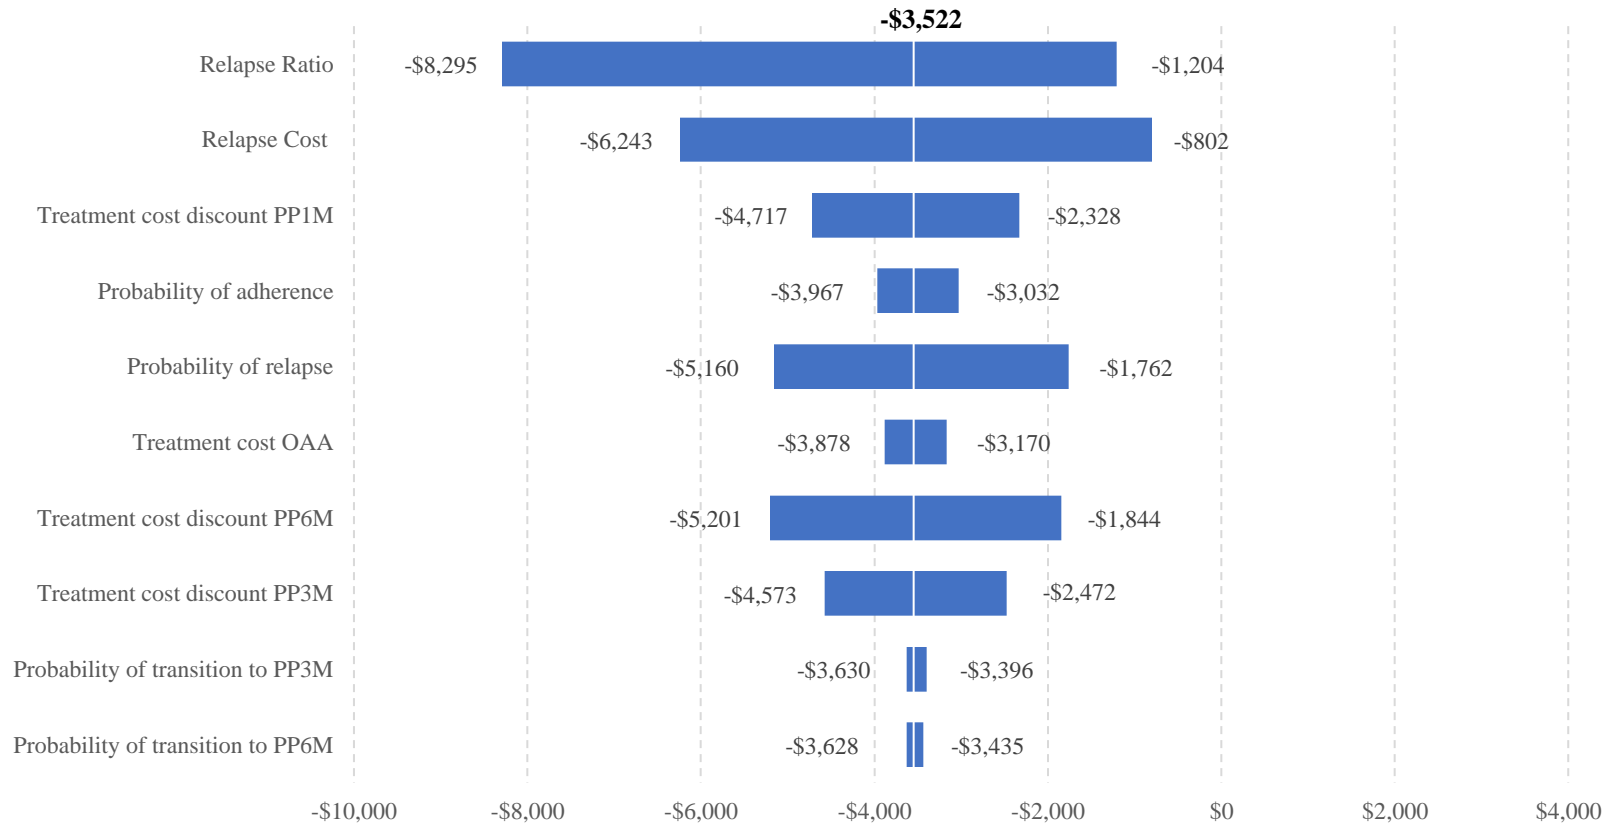

**Abbreviations:** OAA = oral atypical antipsychotic, PP1M = once-monthly paliperidone palmitate, PP3M = once-every-three-months paliperidone palmitate, PP6M once-every-six-months paliperidone palmitate.

**Note:**

1. Upper and lower bounds for each input used in the OSA are as follows: Probability of adherence, PP1M (0.4514, 0.8384); Probability of adherence, OAA (0.4397, 0.8165); Probability of adherence, PP3M (0.6551, 1.0000); Probability of adherence, PP6M (0.6801, 1.0000); Probability of rehospitalization for the relapse ratio, adherent (0.1430, 0.1748); Probability of rehospitalization for the relapse ratio, non-adherent (0.2824, 0.3697); Probability of relapse, adherent (0.1316, 0.1975); Probability of relapse, non-adherent (0.2483, 0.3725); Probability of transition to PP3M (0.0979, 0.1817); Probability of transition to PP6M (0.0925, 0.1719); Treatment cost discount, PP1M (50%, 90%); Treatment cost discount, PP3M (50%, 90%); Treatment cost discount, PP6M (40%, 80%); Cost of relapse (\$16,298, \$30,268); Cost of OAA monthly (\$219, \$407).

**Supplementary Figure 8. Sensitivity analysis: Net cost savings per patients switched from OAA to PP1M among nonadherent, recently relapsed adults in year 3<sup>1</sup>**

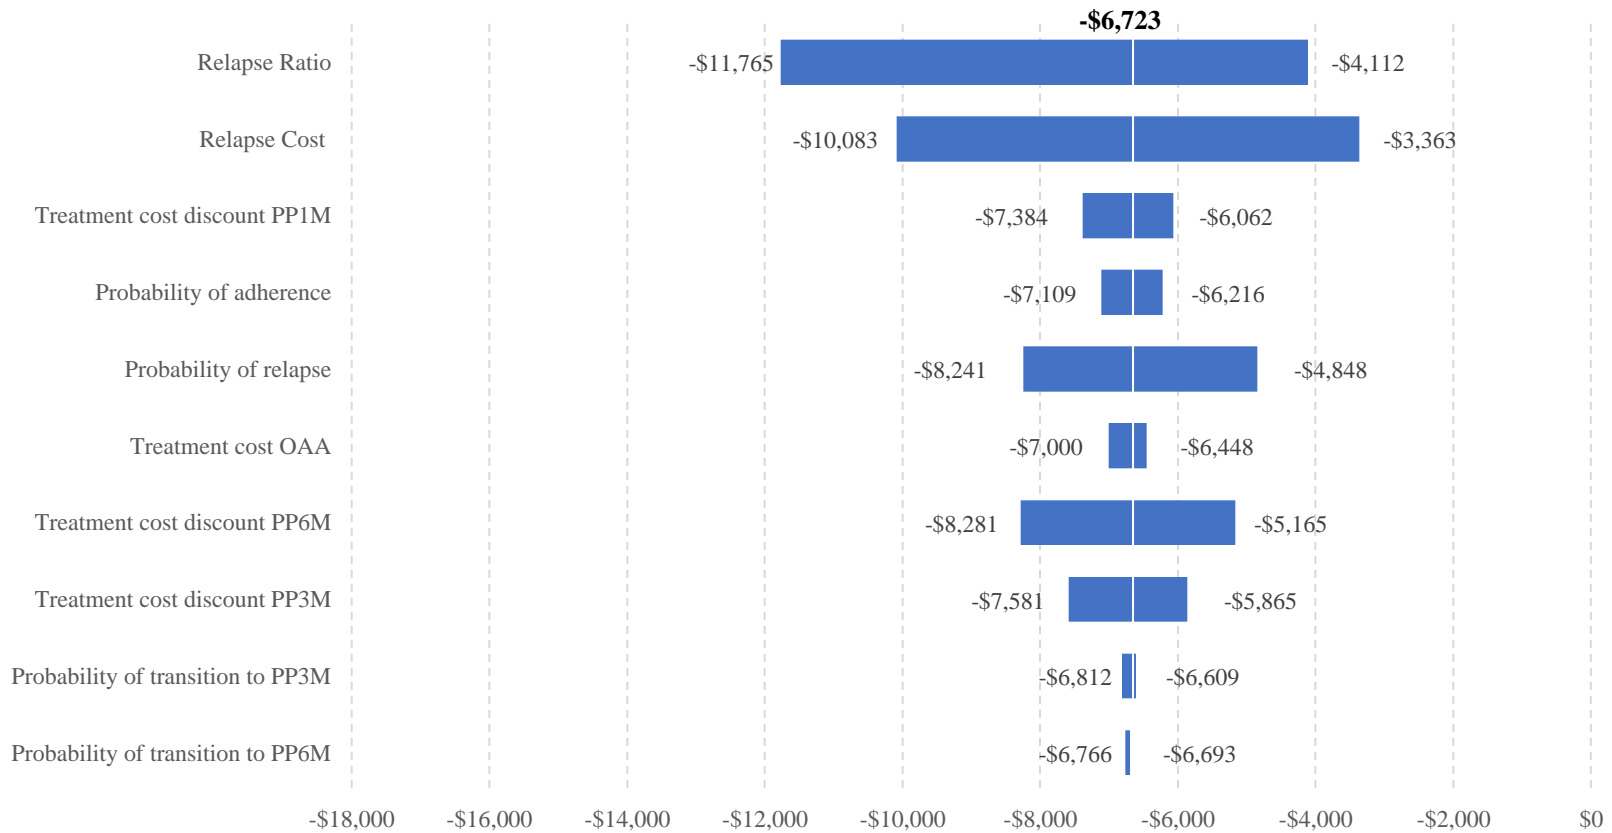

**Abbreviations:** OAA = oral atypical antipsychotic, PP1M = once-monthly paliperidone palmitate, PP3M = once-every-three-months paliperidone palmitate, PP6M once-every-six-months paliperidone palmitate.

**Note:**

1. Upper and lower bounds for each input used in the OSA are as follows: Probability of adherence, PP1M (0.4999, 0.9284); Probability of adherence, OAA (0.3978, 0.7388); Probability of adherence, PP3M (0.6551, 1.0000); Probability of adherence, PP6M (0.6801, 1.0000); Probability of rehospitalization for the relapse ratio, adherent (0.2165, 0.2828); Probability of rehospitalization for the relapse ratio, non-adherent (0.4570, 0.5596); Probability of relapse, adherent (0.2084, 0.3126); Probability of relapse, non-adherent (0.3932, 0.5897); Probability of transition to PP3M (0.0979, 0.1817); Probability of transition to PP6M (0.0925, 0.1719); Treatment cost discount, PP1M (50%, 90%); Treatment cost discount, PP3M (50%, 90%); Treatment cost discount, PP6M (40%, 80%); Cost of relapse (\$16,298, \$30,268); Cost of OAA monthly (\$219, \$407).



**Supplementary Figure 9. Sensitivity analysis: Net cost savings per patients switched from OAA to PP1M among nonadherent, young adults in year 3<sup>1</sup>**

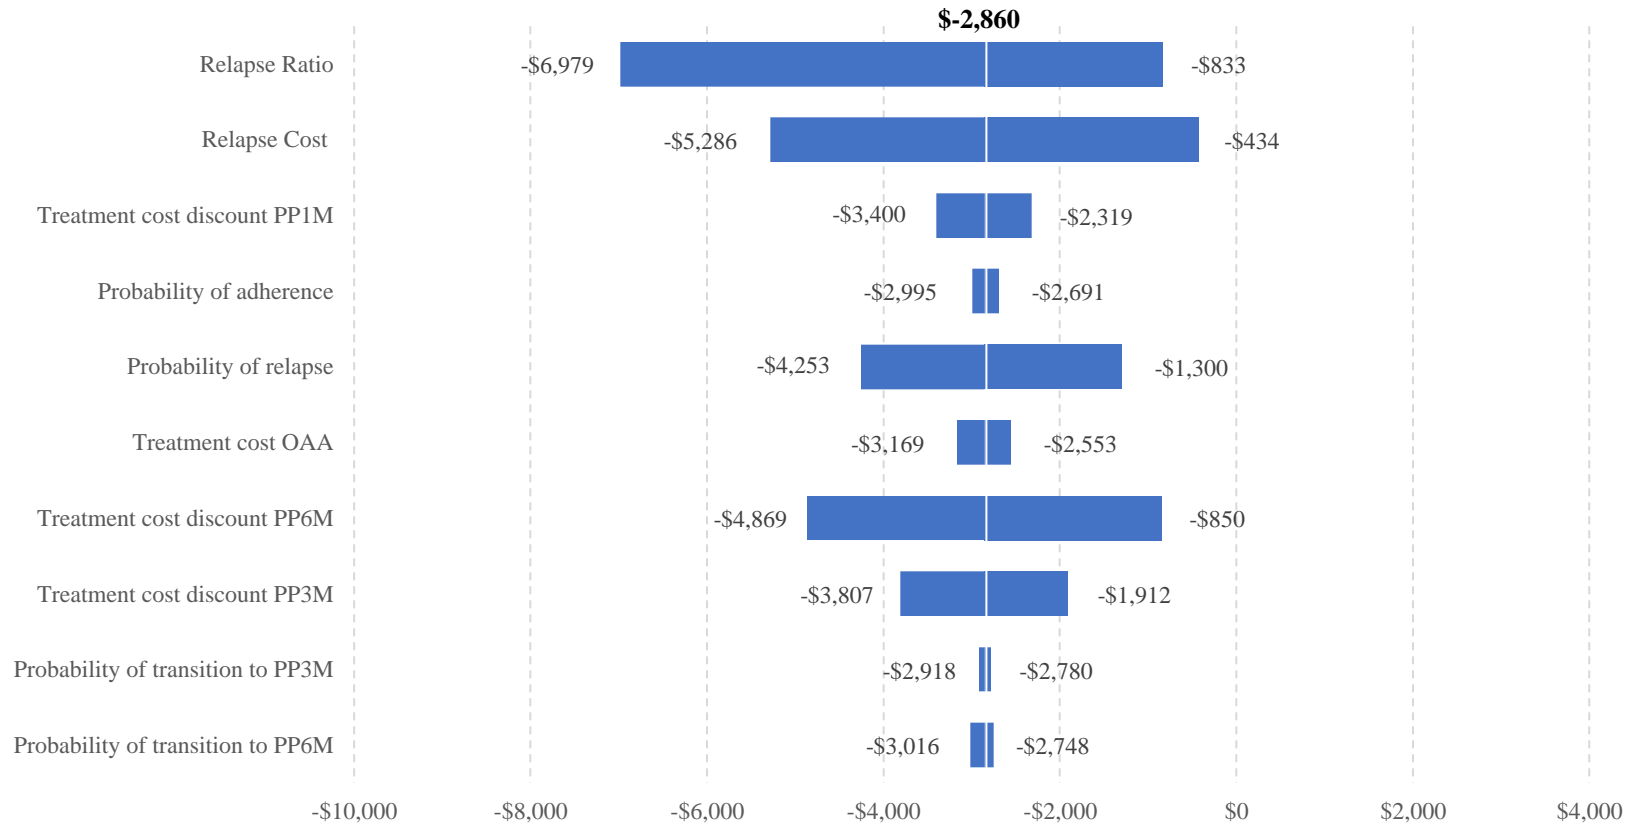

**Abbreviations:** OAA = oral atypical antipsychotic, PP1M = once-monthly paliperidone palmitate, PP3M = once-every-three-months paliperidone palmitate, PP6M once-every-six-months paliperidone palmitate.

**Note:**

1. Upper and lower bounds for each input used in the OSA are as follows: Probability of adherence, PP1M (0.4514, 0.8384); Probability of adherence, OAA (0.4397, 0.8165); Probability of adherence, PP3M (0.6551, 1.0000); Probability of adherence, PP6M (0.6801, 1.0000); Probability of rehospitalization for the relapse ratio, adherent (0.1430, 0.1748); Probability of rehospitalization for the relapse ratio, non-adherent (0.2824, 0.3697); Probability of relapse, adherent (0.1316, 0.1975); Probability of relapse, non-adherent (0.2483, 0.3725); Probability of transition to PP3M (0.0979, 0.1817); Probability of transition to PP6M (0.0925, 0.1719); Treatment cost discount, PP1M (50%, 90%); Treatment cost discount, PP3M (50%, 90%); Treatment cost discount, PP6M (40%, 80%); Cost of relapse (\$16,298, \$30,268); Cost of OAA monthly (\$219, \$407).
